# Supplementary material for: Treatment for sleep apnea by continuous positive airway pressure improves levels of inflammatory markers - a meta-analysis
Source: Springer Nature journal article supplement (doi:10.1186/1476-9255-10-13), 2013-03-22
Supplement: 12950_2012_280_MOESM1_ESM.pdf [file 12950_2012_280_MOESM1_ESM.pdf]

Screening with key words – 3835 studies

Studies excluded after screening for non-English, pediatric, non-human, review, meta-analysis, case series studies, clinical guidelines articles, and editorials. (2625 studies)

Applied for detailed evaluation – 1210 studies

Studies found unrelevant after screening for title and abstract. (1145 studies)

Evaluation of full text studies – 65 studies

Studies excluded after screening full text for serum levels of selected inflammatory marker before and after CPAP treatment. (42 studies)

Studies to be included in the meta-analysis – 23 studies
