# Supplementary material for: Treatment for sleep apnea by continuous positive airway pressure improves levels of inflammatory markers - a meta-analysis
Source: Springer Nature journal article supplement (doi:10.1186/1476-9255-10-13), 2013-03-22
Supplement: 12950_2012_280_MOESM5_ESM.pdf [file 12950_2012_280_MOESM5_ESM.pdf]

**Table 4: Selected studies measuring serum IL-6 before and after CPAP**

| <b>Study</b>                             | <b>Study Design</b> | <b>Study population characteristics</b> | <b>OSA definition</b> | <b>Minimum CPAP usage</b>                  | <b>Outcome</b>          |
|------------------------------------------|---------------------|-----------------------------------------|-----------------------|--------------------------------------------|-------------------------|
| Arias et al 2008 <sup>76</sup>           | Cross-over          | 25 men                                  | AHI $\geq$ 10         | $\geq$ 3.5 h/day for 3 months              | No significant change   |
| Burioka et al 2008 <sup>82</sup>         | Case-control        | 9 total                                 | AHI > 30              | 5h/day (mean) for 3 months                 | Significantly decreased |
| Carniero et al 2009 <sup>63</sup>        | Case-control        | 7 severely obese men                    | AHI > 30              | $\geq$ 5h/day for 3 months                 | No significant change   |
| Ryan et al 2006 <sup>79</sup>            | Case-control        | 49 men                                  | AHI > 5               | Compliant for 6 weeks                      | No significant change   |
| Steiropoulos et al<br>2009 <sup>80</sup> | Case-control        | 32 total                                | AHI > 5               | $\geq$ 4h/day for 6 months                 | No significant change   |
| Vgontzas et al 2008 <sup>81</sup>        | Case-control        | 16 total                                | AHI > 5               | $\geq$ 4h/day, $\geq$ 5d/week for 3 months | No significant change   |
| Ye et al 2010 <sup>83</sup>              | Case-control        | 10 total                                | AHI $\geq$ 20         | > 4h/day for 6 months                      | Significantly decreased |
| Yokoe et al 2003 <sup>18</sup>           | Case-control        | 17 total                                | AHI $\geq$ 20         | 1 month                                    | Significantly decreased |
