# Supplementary figures and images for: Treatment for sleep apnea by continuous positive airway pressure improves levels of inflammatory markers - a meta-analysis
Source: Springer Nature journal article supplement (doi:10.1186/1476-9255-10-13), 2013-03-22

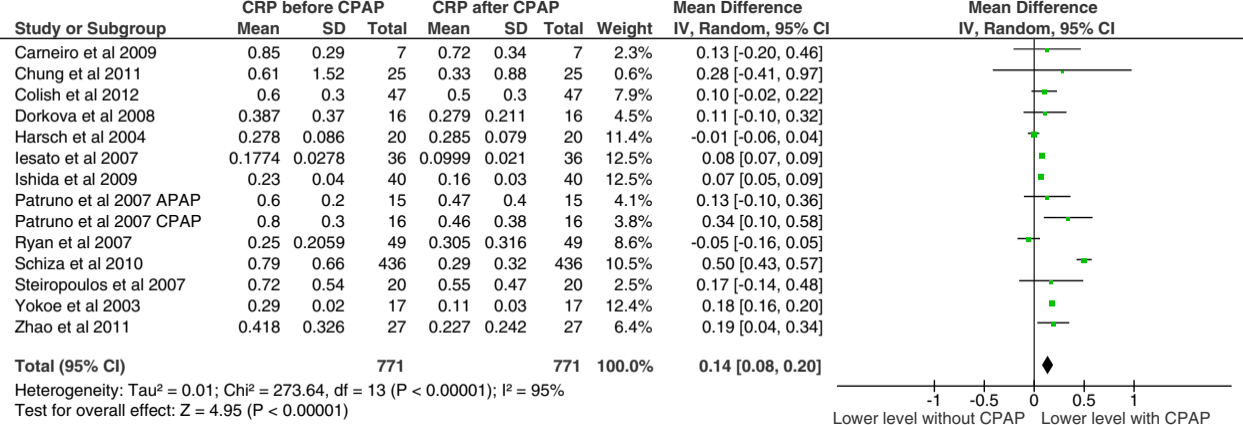

Supplement: 12950_2012_280_MOESM2_ESM.pdf [file 12950_2012_280_MOESM2_ESM.pdf]

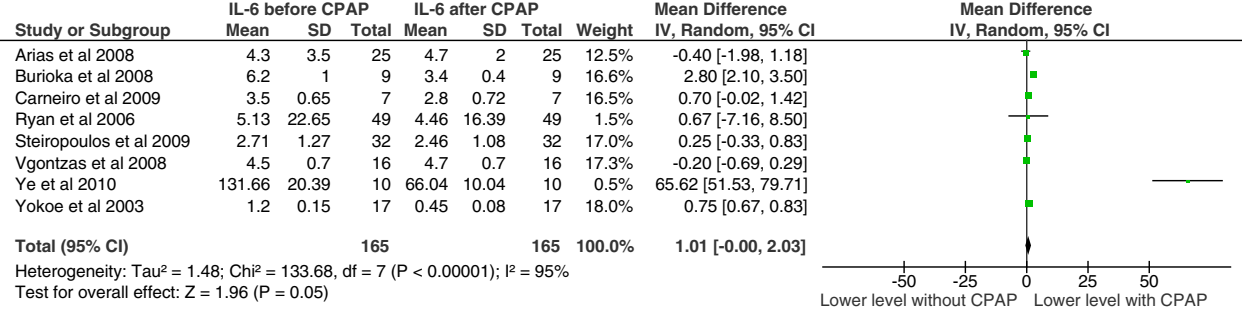

Supplement: 12950_2012_280_MOESM4_ESM.pdf [file 12950_2012_280_MOESM4_ESM.pdf]

**Figure 2: CRP levels before and after CPAP treatment**

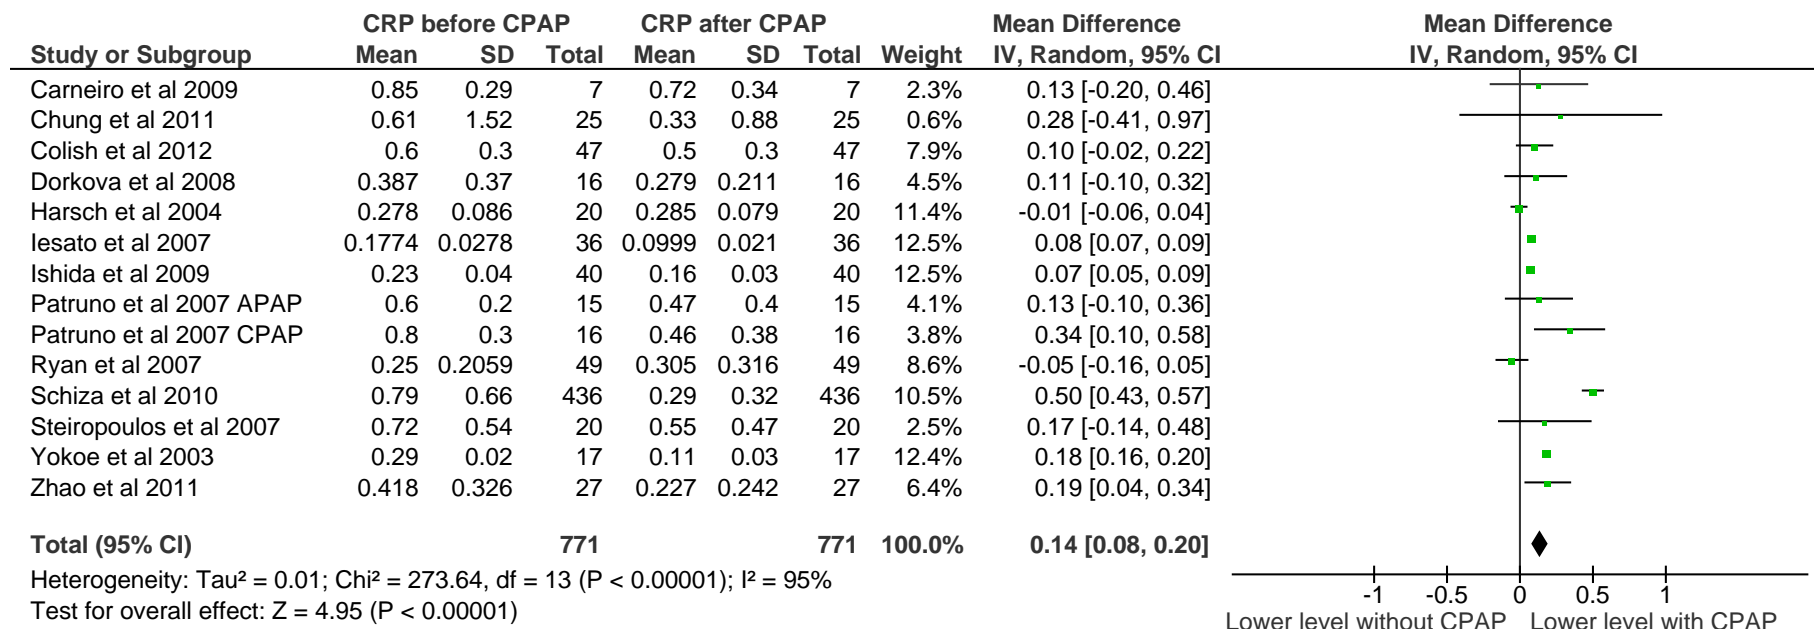

Supplement: 12950_2012_280_MOESM6_ESM.pdf [file 12950_2012_280_MOESM6_ESM.pdf]

**Figure 3: TNF- $\alpha$  levels before and after CPAP treatment**

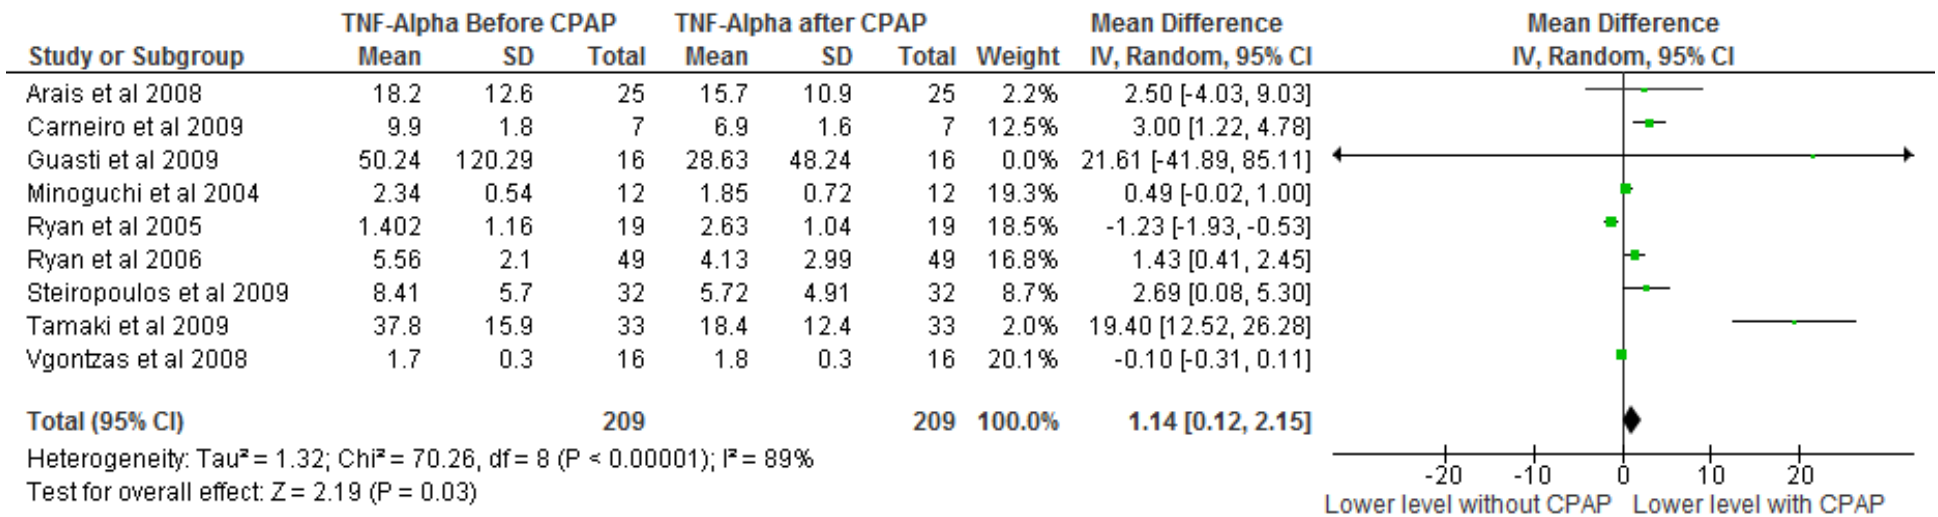

Supplement: 12950_2012_280_MOESM7_ESM.pdf [file 12950_2012_280_MOESM7_ESM.pdf]

**Figure 4: IL-6 levels before and after CPAP treatment**

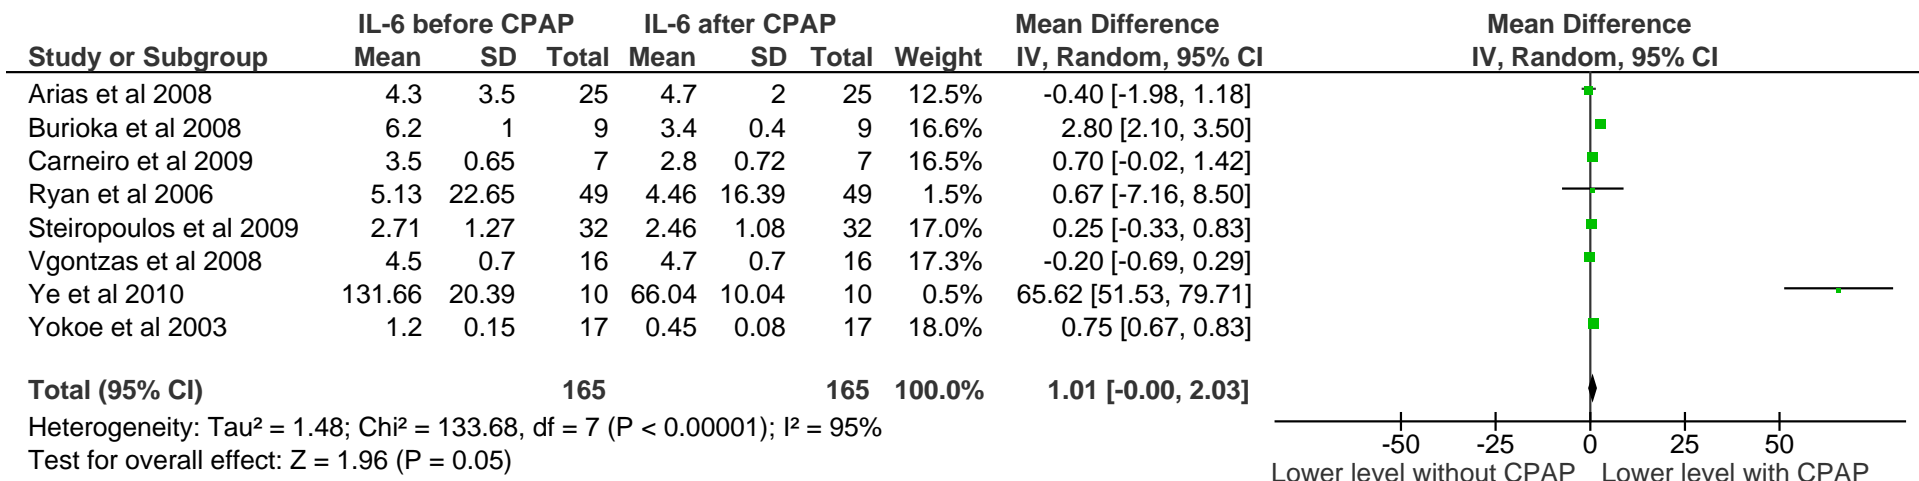

Supplement: 12950_2012_280_MOESM8_ESM.pdf [file 12950_2012_280_MOESM8_ESM.pdf]
